# Supplementary material for: SUV3 helicase is required for correct processing of mitochondrial transcripts
Source: PubMed Central journal article supplement (PMC4551930; doi:10.1093/nar/gkv692), 2015-07-07
Supplement: supp_gkv692_nar-00740-f-2015-File012.pdf [file supp_gkv692_nar-00740-f-2015-File012.pdf]

A

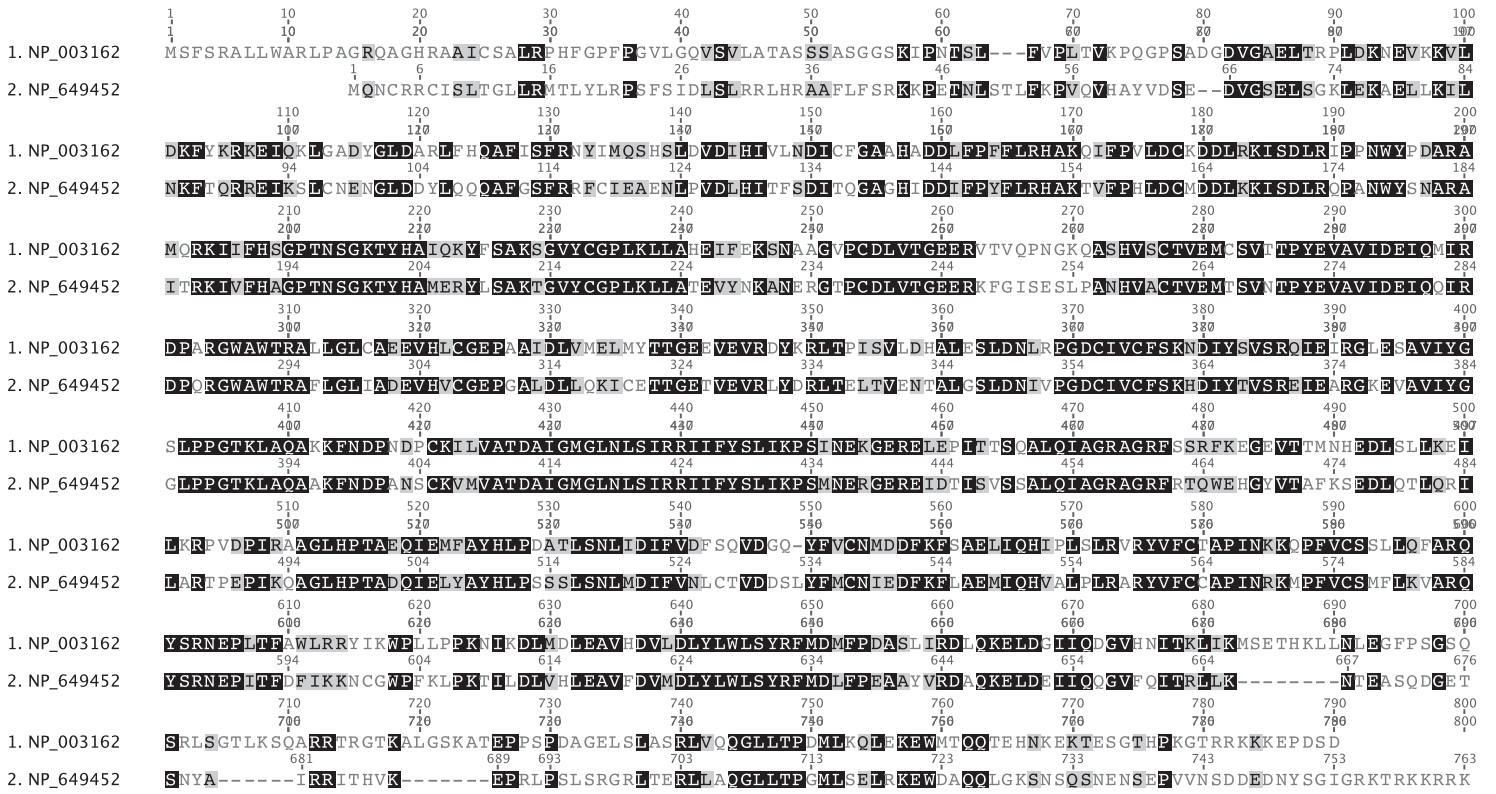

Clemente et al Figure S1

**Figure S1. The mitochondrial helicase SUV3 is conserved between *Drosophila melanogaster* and humans.** (A) ClustalW alignment of the human protein SUPV31L (NP\_003162, top) and its *Dm* ortholog DmSUV3 (NP\_649452, bottom).

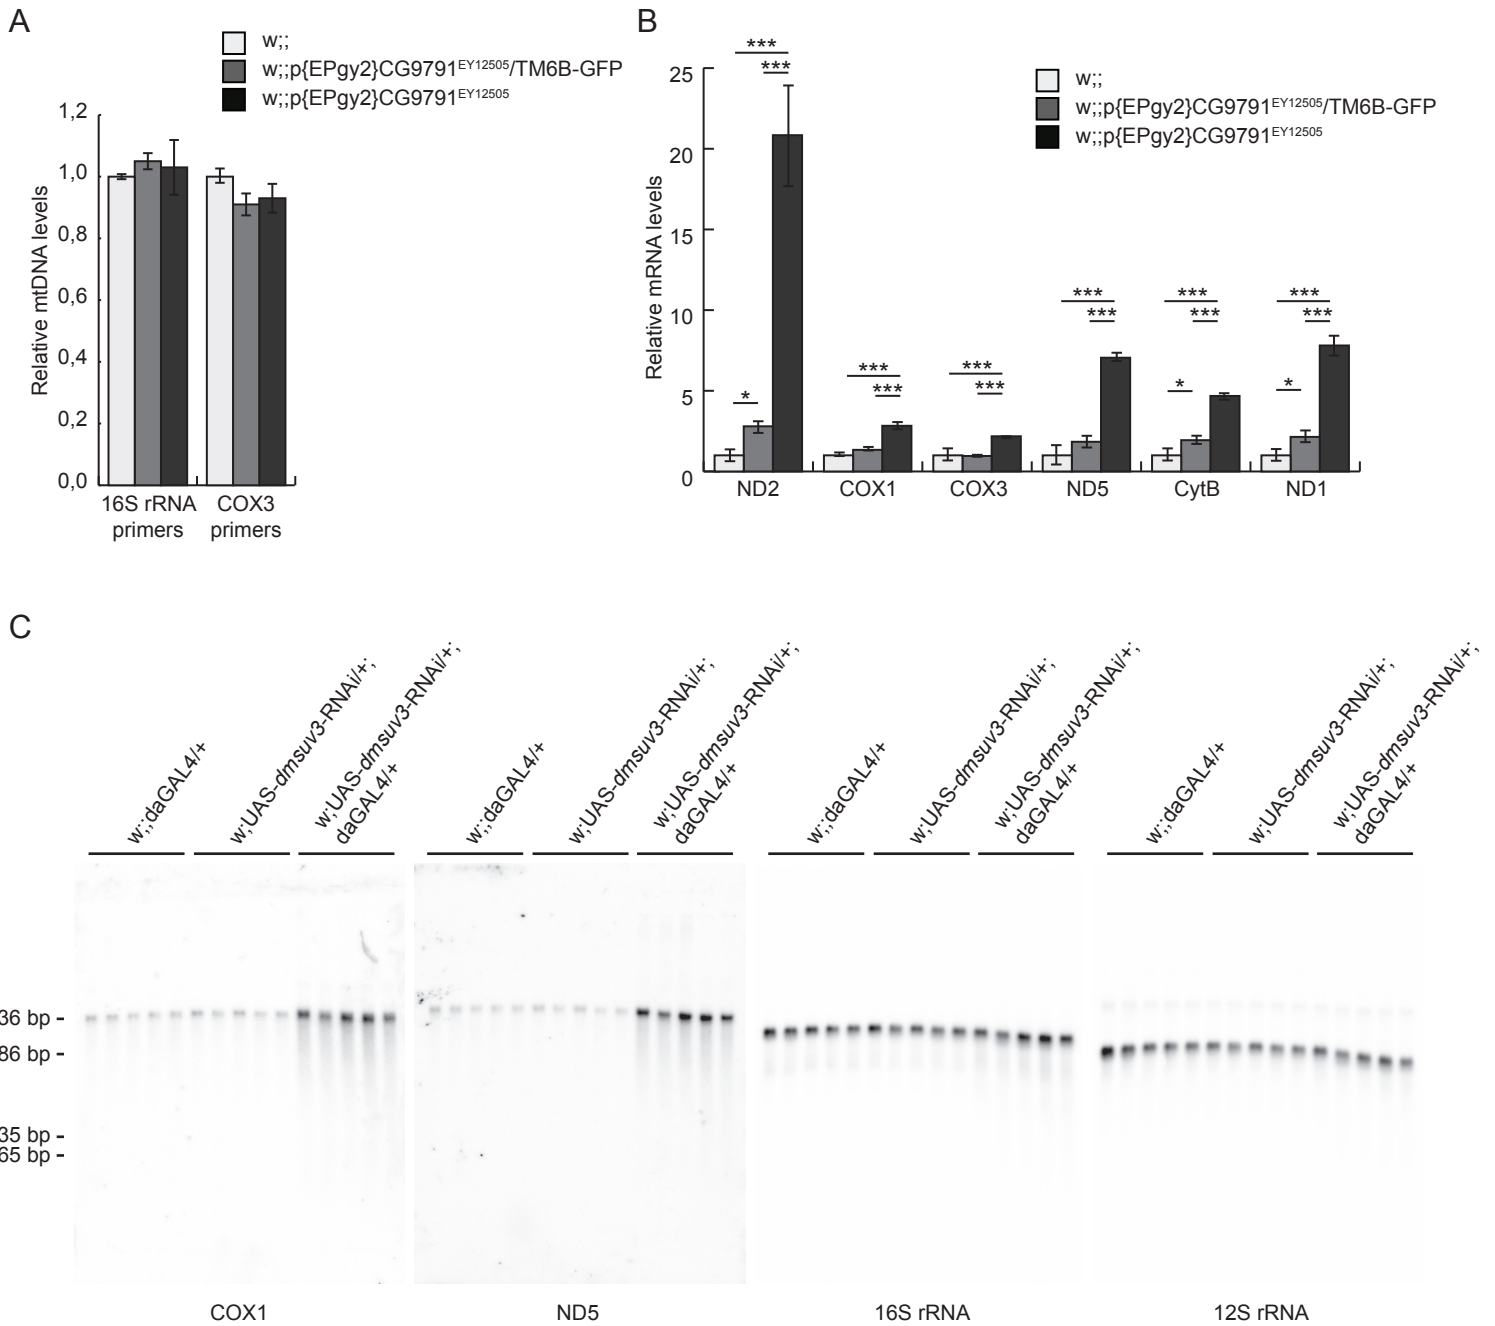

Clemente et al. Figure S2

**Figure S2. Increased mRNA stability in *dmsuv3* knockdown and P-element insertion larvae.** (A) Q-PCR analysis of mtDNA steady-state levels in control (*w;;*), heterozygous P-element insertion (*w;;P{EPgy2}CG9791<sup>EY12505</sup>/TM6B-GFP*) and homozygous P-element insertion (*w;;P{EPgy2}CG9791<sup>EY12505</sup>*) larvae at 3 days ael. (B) qRT-PCR of mitochondrial mRNAs in control, heterozygous P-element insertion and homozygous P-element insertion larvae at 3 days ael. RP49 transcript was used as endogenous control. All data are represented as mean  $\pm$  SEM. (\*  $p < 0.05$ , \*\*\* $p < 0.001$ ,  $n = 5$ ). (C) Northern blot analysis of the steady-state levels of mitochondrial mRNAs and rRNAs in *dmsuv3* KD (*w;;UAS-dmsuv3-RNAi/+;daGAL4/+*) and control (*w;;UAS-dmsuv3-RNAi/+*; and *w;;daGAL4/+*) larvae at 5 days ael.

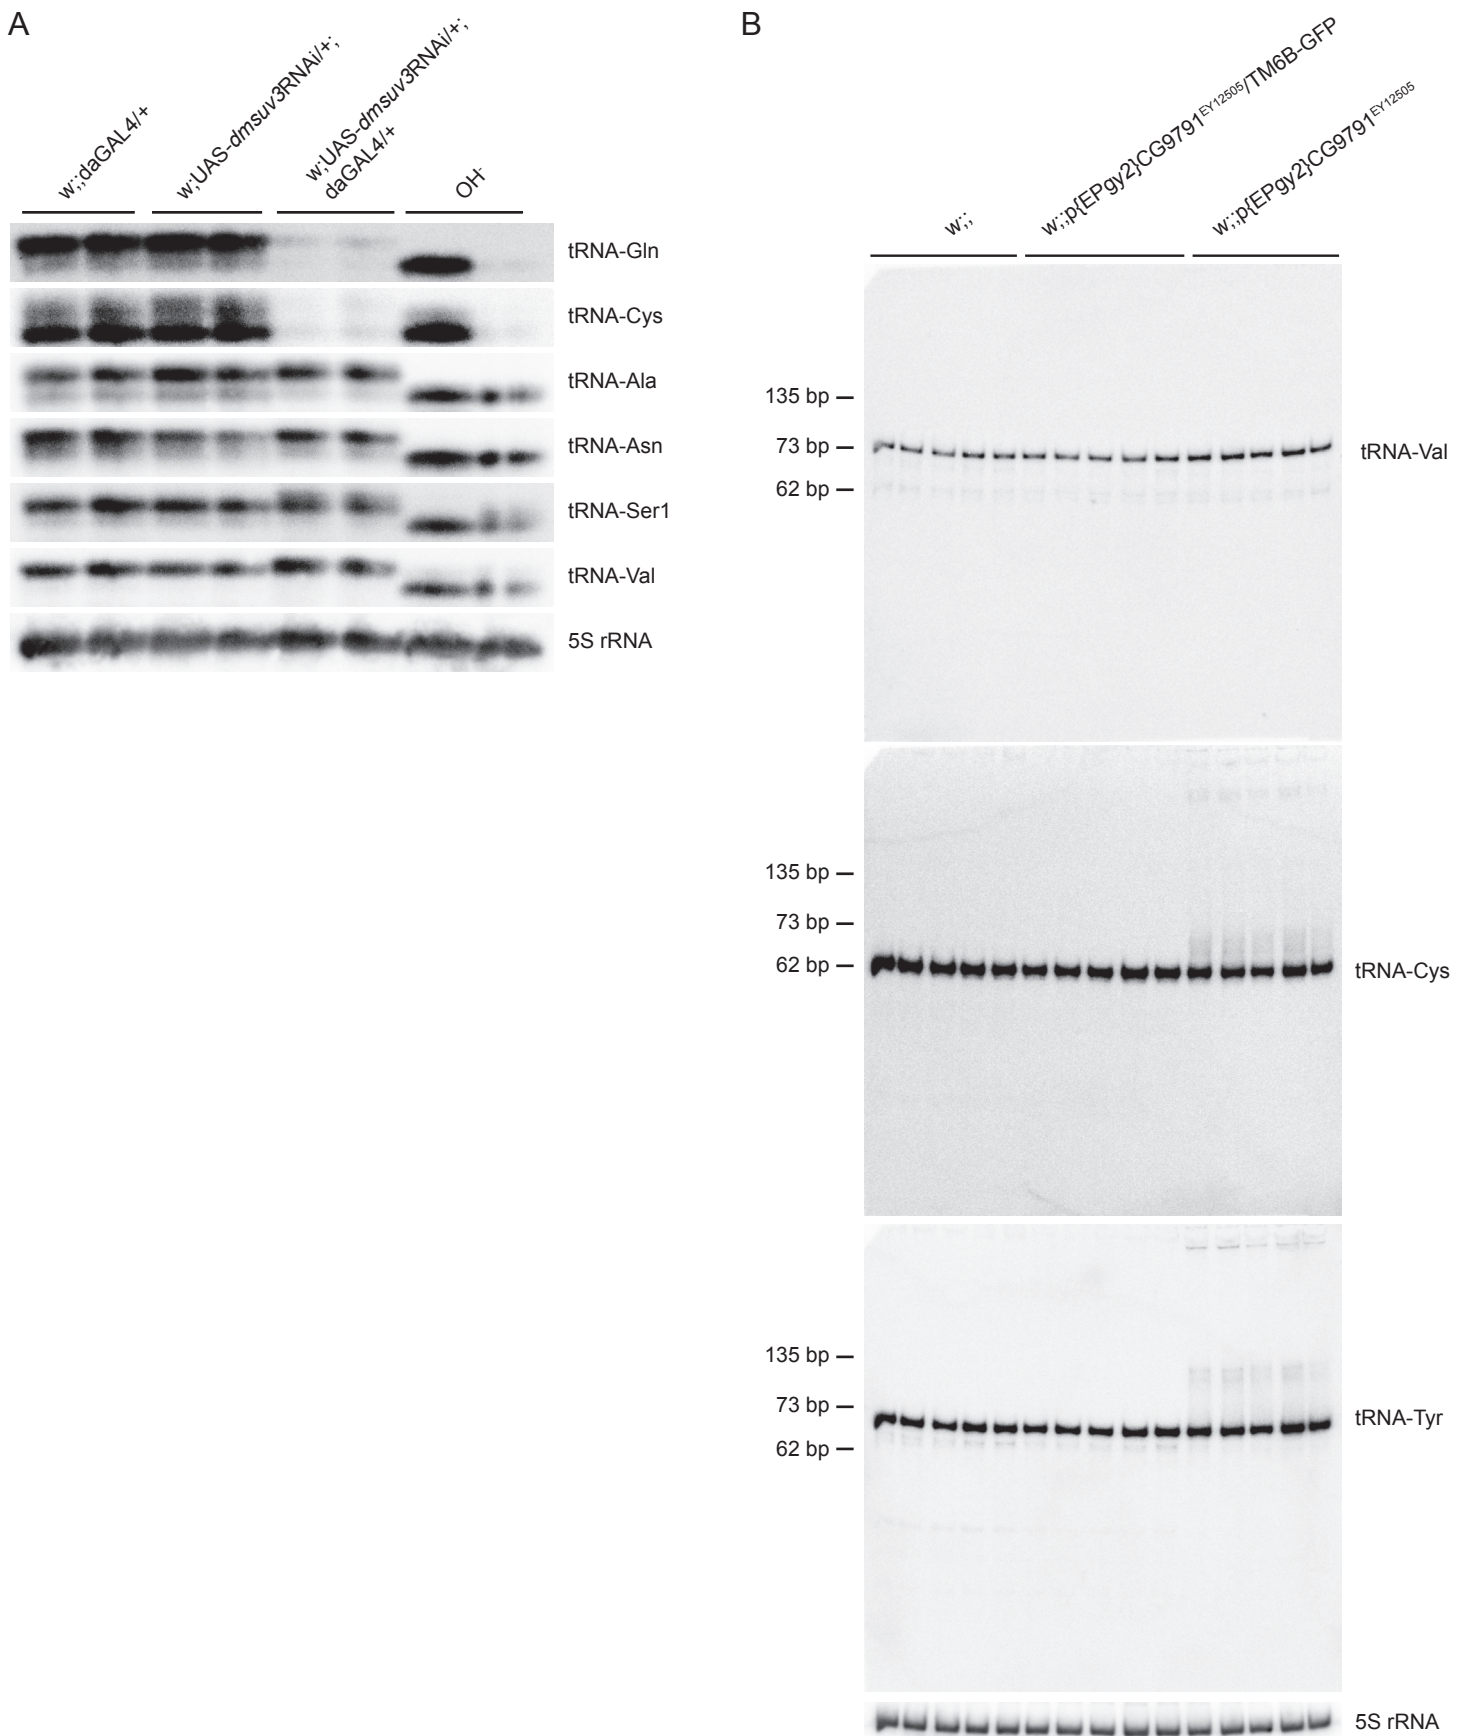

Clemente et al Figure S3

**Figure S3. tRNA maturation in *dmsuv3* deficient larvae.** **A.** Northern blot analysis of the aminoacylation status of mitochondrial tRNAs in *dmsuv3* KD (*w;UAS-dmsuv3RNAi/+;daGAL4/+*) and control (*w;UAS-dmsuv3RNAi/+;* and *w;;daGAL4/+*) larvae at 5 days ael. 5S rRNA is shown as a loading control **B.** Northern blot analysis of mitochondrial tRNA-Val, tRNA-Cys and tRNA-Tyr in control (*w;;*), heterozygous P-element insertion (*w;;P{EPgy2}CG9791<sup>EY12505</sup>/TM6B-GFP*) and homozygous P-element insertion (*w;;P{EPgy2}CG9791<sup>EY12505</sup>*) larvae at 3 days ael. 5S rRNA was used as a loading control.

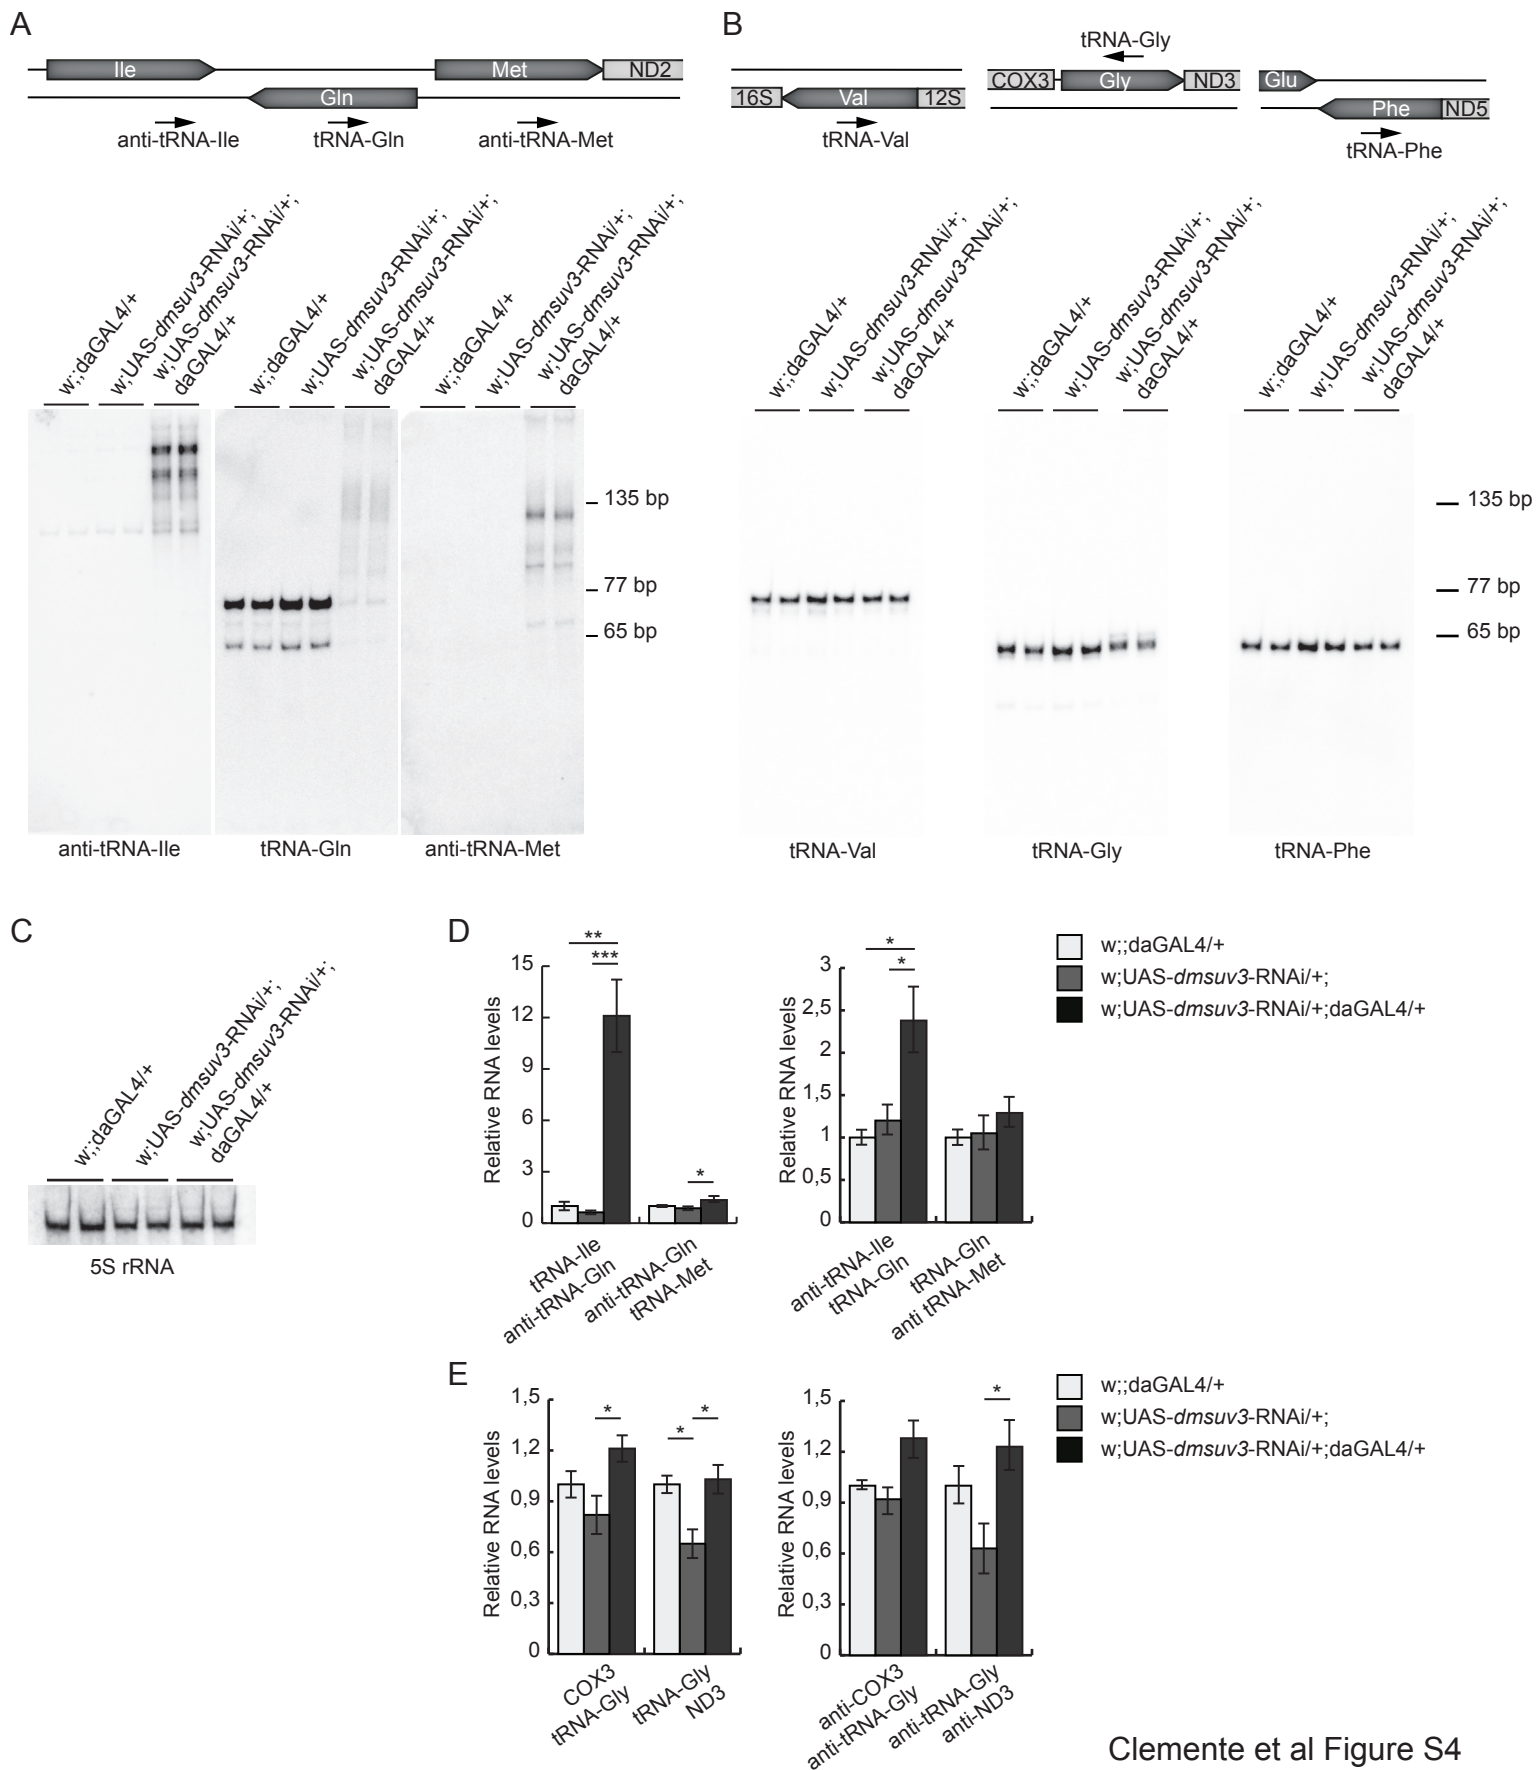

Clemente et al Figure S4

**Figure S4. Loss of DmSUV3 leads to altered processing of non-transcript flanked mitochondrial tRNAs.** (A) Schematic representation of the end-labeled oligonucleotide probes (black arrows) and Northern blot experiments against tRNA-Gln and its 5' and 3' flanking regions in control (*w;UAS-dmsuv3-RNAi/+*; and *w;daGAL4/+*) and *dmsuv3* KD (*w;UAS-dmsuv3-RNAi/+;daGAL4/+*) larvae at 5 days ael. (B) Schematic representation of the end-labeled oligonucleotide probes and Northern blot experiments against tRNA-Val (left panel), tRNA-Gly (middle panel) and tRNA-Phe (right panel) in KD and control larvae at 5 days ael. (C) Northern blot analysis of 5S rRNA, used as a loading control. (D) qRT-PCR of mitochondrial tRNA-Gln, tRNA-Ile and tRNA-Met junctions in KD and control larvae at 5 days ael. RP49 transcript was used as endogenous control. (E) qRT-PCR of mitochondrial tRNA-Gly, COX3 and ND3 junctions in KD and control larvae at 5 days ael. RP49 transcript was used as endogenous control. All data are represented as mean  $\pm$  SEM. (\*  $p < 0.05$ , \*\*  $p < 0.01$ , \*\*\*  $p < 0.001$ ,  $n = 5$ ).

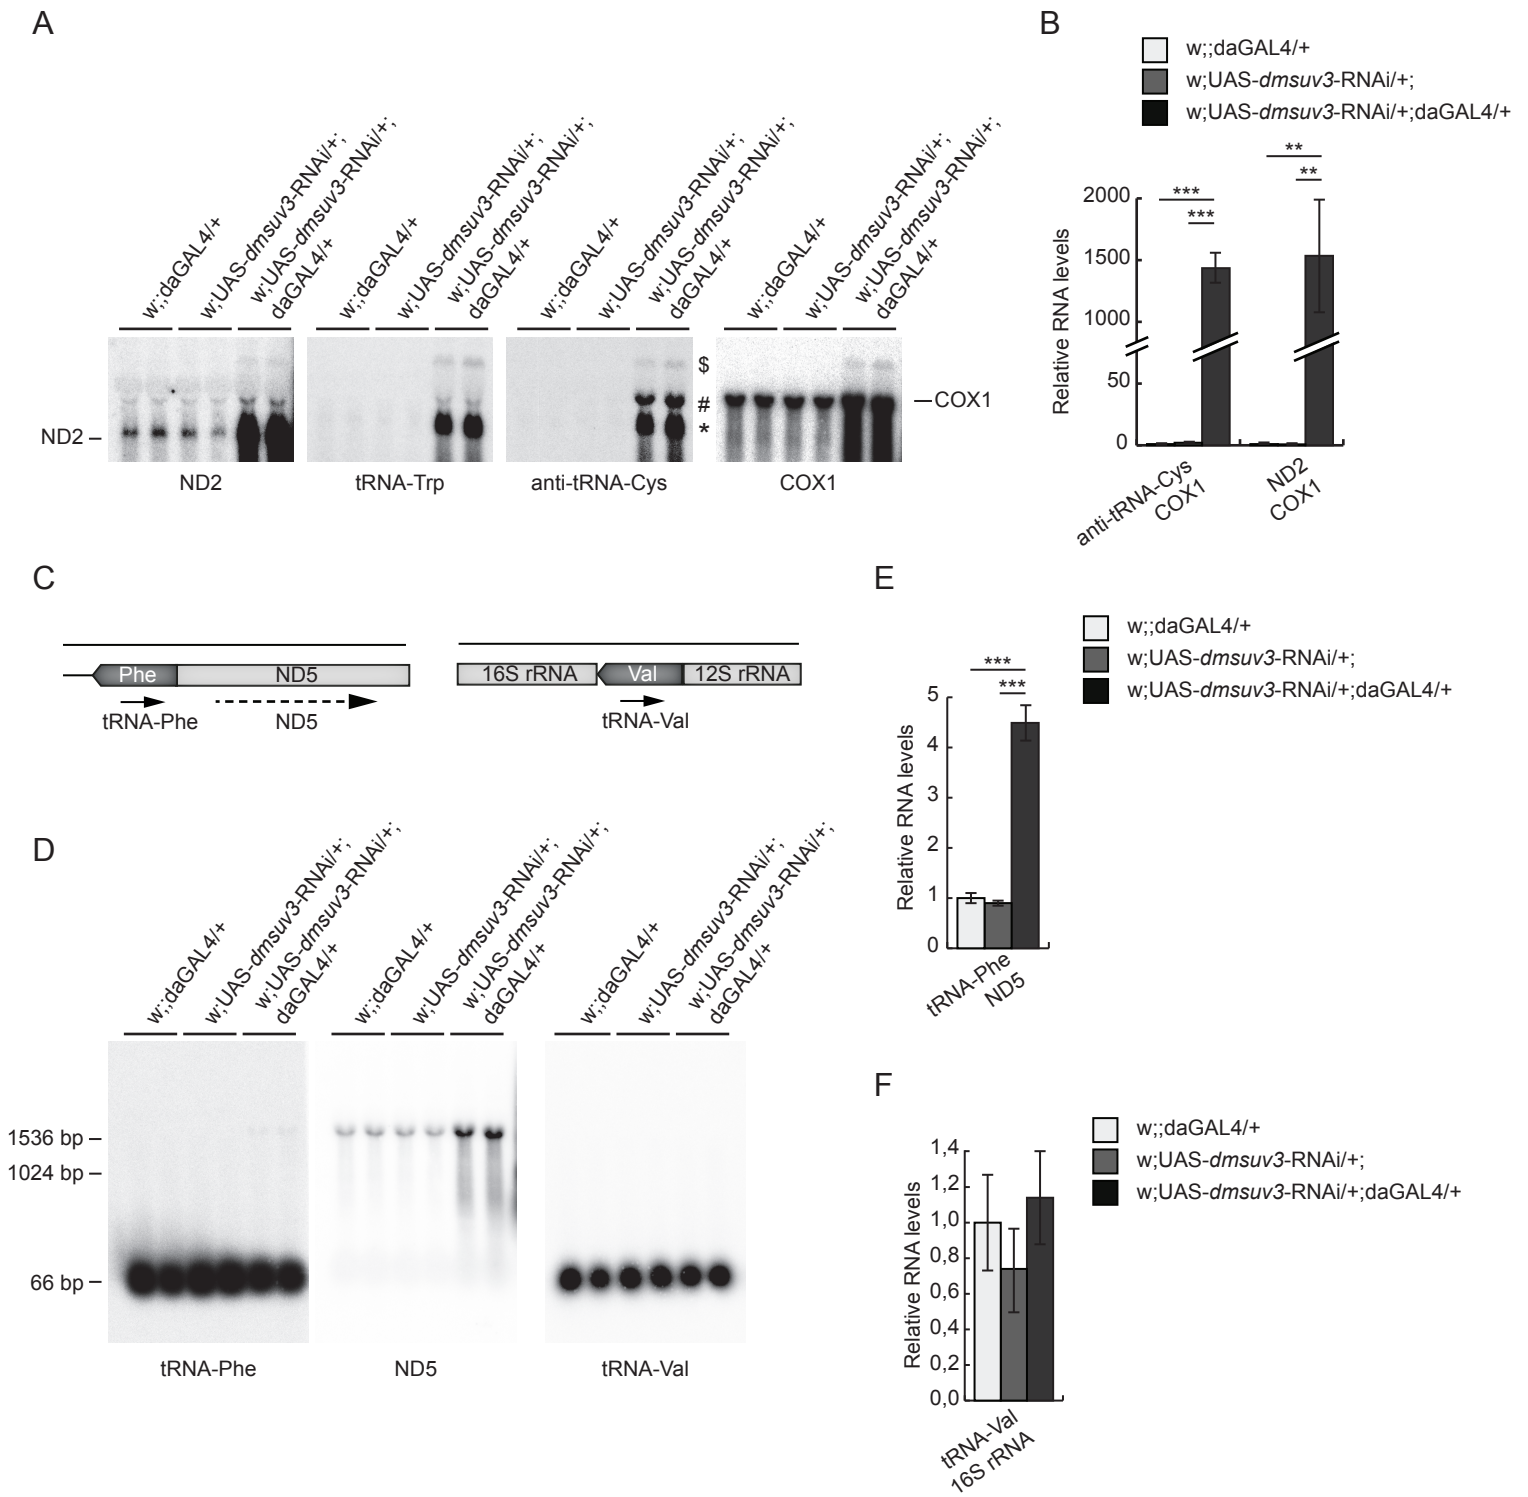

Clemente et al Figure S5

**Figure S5. Loss of DmSUV3 leads to altered processing of non-transcript flanked mitochondrial tRNAs.** (A) Overexposure of the Northern blot experiments shown in figure 6C in *dmsuv3* KD (*w;UAS-dmsuv3-RNAi/+;daGAL4/+*) and control (*w;UAS-dmsuv3-RNAi/+;* and *w;;daGAL4/+*) larvae at 5 days ael. (B) qRT-PCR of the mitochondrial anti-tRNA-Cys-COX1 and ND2-COX1 containing transcripts in KD and control larvae at 5 days ael. (C) Schematic representation of the end-labeled oligonucleotide probes (black arrows) and single-stranded RNA probes (dashed arrows) used in Northern blot experiments. (D) Northern blot experiments against tRNA-Phe and ND5 (left panel) and tRNA-Val (right panel) in control and *dmsuv3* KD larvae at 5 days ael. (E) qRT-PCR of the mitochondrial tRNA-Phe-ND5 junction in KD and control larvae at 5 days ael. RP49 transcript was used as endogenous control. (F) qRT-PCR of the mitochondrial tRNA-Val-16S junction in KD and control larvae at 5 days ael. RP49 transcript was used as endogenous control. All data are represented as mean  $\pm$  SEM. (\*\*\*)  $p < 0.001$ ,  $n = 5$ ).
